# Supplementary material for: Thermo-responsive adsorption and separation of amino acid enantiomers using smart polymer-brush-modified magnetic nanoparticles
Source: Royal Society of Chemistry journal article supplement (doi:10.1039/c5nj03516c), 2016-01-01
Supplement: c5nj03516c1.pdf [file c5nj03516c1.pdf]

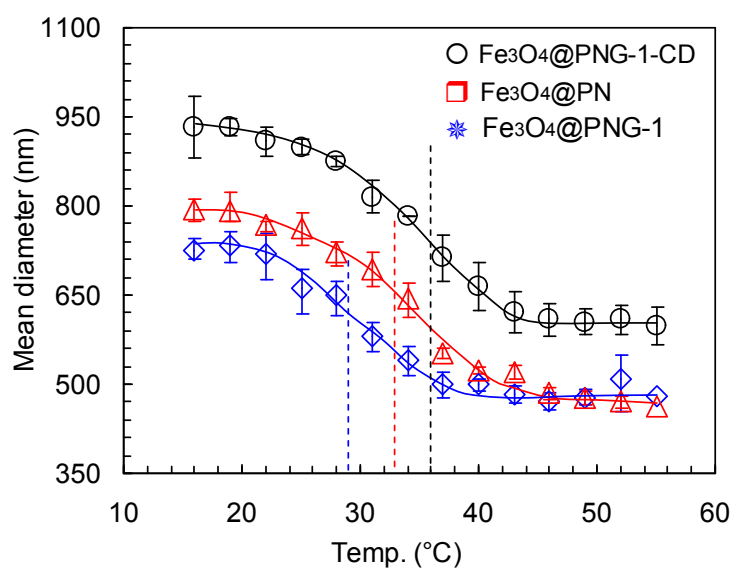

**Fig. S1** Temperature-dependant hydrodynamic diameter changes of the Fe<sub>3</sub>O<sub>4</sub>@PNG-1, Fe<sub>3</sub>O<sub>4</sub>@PN and Fe<sub>3</sub>O<sub>4</sub>@PNG-1-CD MNPs in aqueous solution.
